## CORRESPONDENCE

Anesthesiology  
55:476, 1981

### Convulsant Blood Levels of Bupivacaine

*To the Editor:*—We read with interest the report of Drs. Colley and Heavner concerning blood levels of bupivacaine.<sup>1</sup> In their discussion, they stated “The blood levels of bupivacaine resulting in convulsant activity are not known,” and went on to compare the value of arterial and venous samples.

In 1979, we reported a case in which we were able to obtain an *arterial* blood level of bupivacaine *during* a convulsion caused by inadvertent intravascular injection during an attempted epidural block.<sup>2</sup> The arterial bupivacaine concentration during the convulsion was 5.4 µg/ml. One minute later, after the convulsion had abated, the concentration was 3.5 µg/ml.

As we stated in our conclusions, this one sample does support previous findings that arterial levels of 4.0 µg/ml or less of bupivacaine do not result in convulsions.<sup>3,4</sup>

DESIRAY C. FITZGIBBONS, M.D.  
*Staff Anesthesiologist*  
*Department of Anesthesiology*  
*Group Health Hospital*  
*2700 152nd Avenue NE*  
*Redmond, Washington 98052*

Anesthesiology  
55:476-477, 1981

DANIEL C. MOORE, M.D.  
*Senior Consultant*  
*Department of Anesthesiology*  
*The Mason Clinic*  
*1100 Ninth Avenue*  
*Seattle, Washington 98111*

ROBERT I. BALFOUR, M.D.  
*Staff Anesthesiologist*  
*Department of Anesthesiology*  
*Overlake Memorial Hospital*  
*1035 116th NE*  
*Bellevue, Washington 98004*

#### REFERENCES

1. Colley PS, Heavner JE: Blood levels of bupivacaine after injection into the scalp with and without epinephrine. *ANESTHESIOLOGY* 54:81-84, 1981
2. Moore DC, Balfour RI, Fitzgibbons D: Convulsive arterial plasma levels of bupivacaine and the response to diazepam therapy. *ANESTHESIOLOGY* 50:454-456, 1979
3. Moore DC, Mather LE, Bridenbaugh PO, et al: Arterial and venous plasma levels of bupivacaine following epidural and intercostal nerve blocks. *ANESTHESIOLOGY* 45:30-45, 1976
4. Moore DC, Mather LE, Bridenbaugh LD, et al: Arterial and venous plasma levels of bupivacaine following peripheral nerve blocks. *Anesth Analg (Cleve)* 55:763-768, 1976

(Accepted for publication February 26, 1981)

### Use of Fiberoptic Bronchoscope to Change Endotracheal Tube Endorsed

*To the Editor:*—I was interested to see the case report of Rosenbaum, *et al.*<sup>1</sup> relating an experience with the bronchoscopic tube change technique in critically ill patients. Our group in the intensive care unit of the Naval Medical Center, Bethesda, had a similar experience and examined this technique in a prospective manner.\* Our indications for use of this technique when tube change is necessary include respiratory failure requiring high PEEP, hemodynamic instability and increased sensitivity to sedatives or relaxants, grossly abnormal anatomy, history of difficult intubation, and unstable cervical frac-

tures or facial fractures. Advantages of the technique include a minimal requirement for sedative, anesthetic, or relaxant drugs, a shortened time for tube change *vs.* other methods, a reduced risk of aspiration, minimal hemodynamic insult, and the opportunity to precisely locate the endotracheal tube position during intubation. Problems which we encountered relate to the limitation in laryngeal capacity for the preexistent endotracheal tube and the bronchoscope in children and small patients, the inability to perform the procedures when the hypopharynx is obscured by bleeding, and the fact that it requires some skill with the fiberoptic instrument.

In the series of 15 adult patients which we reported, we were unable to change the tubes of three without resorting to a direct visualization method. One of these

\* Watson C, Balestieri F, Prough D: Bronchoscopic tube change in critically ill patients. Abstracts of the Society of the Critical Care Medicine annual meeting, 1980

patients aspirated during endotracheal tube change with sedation and paralysis under direct vision and a second became hypotensive during the procedure. Only one of the bronchoscopic tube change patients became hypotensive.

The availability of smaller diameter bronchoscopes like the Olympus BF-4B2® (4.8 mm, OD) and the BF-3C4® (3.5 mm, OD) has allowed the use of this technique for patients with smaller laryngeal dimensions via smaller internal diameter endotracheal tubes. There is no reason why any skilled endoscopist cannot perform this procedure; however, I should like to emphasize my concern that the technique should only be attempted with the back-up of proven alternatives like direct laryngoscopy and intubation or emergency tracheostomy by skilled individuals in the event of unexpected difficulty.

Anesthesiology  
55:477, 1981

### Use of Cold Nasogastric Tubes Corrects Problems Due to Pliability

*To the Editor:*—The recent Clinical Report by Rosenbaum *et al.*<sup>1</sup> cites excessive pliability of nasogastric tubes as the major reason for difficulties in changing endotracheal tubes. The authors note that the flexible fiberoptic bronchoscope provides a more rigid stent over which to pass the endotracheal tube.

We have not encountered the authors' difficulties using nasogastric tubes for endotracheal tube change, perhaps because we have, on occasion, used a Levin tube made more rigid by exposure to cold. Our procedure consists of placing a nasogastric tube, still sterile inside its wrapper, in a container of ice for 20 min. This makes the Levin tube less pliable to guide the new endotracheal tube into the trachea. The nasogastric tube and new endotracheal tube are lubricated to facilitate easier passage.

Admittedly, use of the flexible fiberoptic bronchoscope provides the greatest number of options for changing endotracheal tubes since a nasal tube can be changed from one nostril to the other or converted to an oral tube. (Use of a nasogastric tube, on the other hand, for the most part requires that the existing route be used for the new endotracheal tube.) However, in a situation where a fiberoptic bronchoscope, or personnel trained in its use are not available, or when the endotracheal tube is too

In conclusion, I should like to endorse the technique described and agree that it may be safer and more certain than other methods commonly used.

CHARLES B. WATSON, M.D.  
*Assistant Professor of  
Anesthesiology/Critical  
Care Medicine  
North Carolina Memorial Hospital  
University of North Carolina  
Chapel Hill, North Carolina 27514*

#### REFERENCE

1. Rosenbaum SH, Rosenbaum LH, Cole RP, et al: Use of the flexible fiberoptic bronchoscope to change endotracheal tubes in critically ill patients. *ANESTHESIOLOGY* 54:169-170, 1981

*(Accepted for publication March 2, 1981.)*

small to allow passage of the fiberoptic bronchoscope, a cold-hardened Levin tube may provide a successful solution to the clinical problem. Finally, if difficulties should occur during the endotracheal tube changeover, the lumen of Levin tube may be used to administer oxygen until successful passage of the new endotracheal tube can be accomplished.

EDWARD TEEPLE, M.D.  
*Anesthesiology Fellow*

EDWIN A. BOWE, M.D.  
*Assistant Professor of  
Anesthesiology and Pediatrics*

*Department of Anesthesiology  
The University of North  
Carolina at Chapel Hill  
North Carolina Memorial Hospital  
Chapel Hill, North Carolina 27514*

#### REFERENCE

1. Rosenbaum SH, Rosenbaum LM, Cole RP, et al: Use of the flexible fiberoptic bronchoscope to change endotracheal tubes in critically ill patients. *ANESTHESIOLOGY* 54:169-170, 1981

*(Accepted for publication March 2, 1981.)*
